# Supplementary material for: Chemical Composition and Cytoprotective Activities of Methanolic Extract of Asplenium adiantum-nigrum L. (Aspleniaceae)
Source: MDPI journal article supplement (doi:10.3390/horticulturae8090815), 2022-09-06
Supplement: s1 [file s1]

**Table S1**

HPLC–MS/MS acquisition parameters (dynamic-MRM mode) used for the analysis of the 38 marker compounds.

| No. | Compounds                     | Precursor ion, <i>m/z</i> | Product ion, <i>m/z</i> | Fragm-entor, V | Collision energy, V | Polarity | Retention time (Rt, min) |
|-----|-------------------------------|---------------------------|-------------------------|----------------|---------------------|----------|--------------------------|
| 1   | Gallic acid                   | 169                       | 125.2*                  | 97             | 12                  | Negative | 6.96                     |
| 2   | Neochlorogenic acid           | 353                       | 191.2*, 179             | 82             | 12, 12              | Negative | 9.52                     |
| 3   | Delphinidin-3-galactoside     | 465.01                    | 303*                    | 121            | 20                  | Positive | 11.36                    |
| 4   | (+)-Catechin                  | 289                       | 245.2*, 109.2           | 131            | 8, 20               | Negative | 11.44                    |
| 5   | Procyanidin B2                | 576.99                    | 576.99*, 321.2          | 160            | 0, 32               | Negative | 12.41                    |
| 6   | Chlorogenic acid              | 353                       | 191.2*, 127.5           | 82             | 12, 20              | Negative | 12.42                    |
| 7   | <i>p</i> -Hydroxybenzoic acid | 137                       | 93.2*                   | 92             | 16                  | Negative | 12.86                    |
| 8   | (-)-Epicatechin               | 289                       | 245.1*, 109.1           | 126            | 8, 20               | Negative | 13.03                    |
| 9   | Cyanidin-3-glucoside          | 449                       | 287.3*, 255.6           | 121            | 20, 20              | Positive | 13.14                    |
| 10  | Petunidin-3-glucoside         | 479.01                    | 317*, 302               | 121            | 20, 44              | Positive | 13.26                    |
| 11  | 3-Hydroxybenzoic acid         | 137                       | 93.2*                   | 88             | 8                   | Negative | 13.59                    |
| 12  | Caffeic acid                  | 179                       | 135.2*, 134.1           | 92             | 12, 24              | Negative | 13.65                    |
| 13  | Vanillic acid                 | 167                       | 152.4*, 108.1           | 88             | 12, 20              | Negative | 14.32                    |
| 14  | Resveratrol                   | 227                       | 185*                    | 60             | 40                  | Negative | 14.40                    |
| 15  | Pelargonidin-3-glucoside      | 433.01                    | 271*, 121               | 116            | 24, 50              | Positive | 14.52                    |
| 16  | Pelagonidin-3-rutinoside      | 579.01                    | 271*                    | 145            | 32                  | Positive | 14.56                    |
| 17  | Malvidin-3-galactoside        | 493.01                    | 331*, 315.1             | 121            | 20, 50              | Positive | 14.64                    |
| 18  | Syringic acid                 | 196.9                     | 182.2*, 121.2           | 93             | 8, 12               | Negative | 15.28                    |
| 19  | Procyanidin A2                | 575                       | 575*, 285               | 170            | 0, 20               | Negative | 16.18                    |
| 20  | <i>p</i> -Coumaric acid       | 163                       | 119.2*, 93.2            | 83             | 12, 36              | Negative | 16.70                    |
| 21  | Ferulic acid                  | 193                       | 134.2*, 131.6           | 83             | 12, 8               | Negative | 17.10                    |
| 22  | 3,5-Dicaffeoylquinic acid     | 514.9                     | 353.1*, 191             | 117            | 8, 28               | Negative | 17.61                    |
| 23  | Rutin                         | 609                       | 300.2*, 271.2           | 170            | 32, 50              | Negative | 17.73                    |
| 24  | Hyperoside                    | 465.01                    | 303*, 61.1              | 97             | 8, 50               | Positive | 18.33                    |
| 25  | Isoquercitrin                 | 463                       | 271.2*, 300.2           | 155            | 44, 24              | Negative | 18.36                    |
| 26  | Delphinidin-3,5-diglucoside   | 462.9                     | 300.1*                  | 165            | 24                  | Negative | 18.38                    |
| 27  | Phloridzin                    | 435.39                    | 273*, 167               | 155            | 8, 28               | Negative | 18.83                    |
| 28  | Quercitrin                    | 446.99                    | 300.2*, 301.2           | 160            | 24, 16              | Negative | 19.61                    |
| 29  | Myricetin                     | 316.99                    | 179.1*, 182             | 150            | 16, 24              | Negative | 19.61                    |
| 30  | Naringin                      | 578.99                    | 271.3*, 151.3           | 170            | 32, 44              | Negative | 19.62                    |
| 31  | Kaempferol-3-glucoside        | 447                       | 284.2*, 255.2           | 170            | 24, 40              | Negative | 19.77                    |
| 32  | Hesperidin                    | 611.01                    | 303*, 334.8             | 112            | 20, 12              | Positive | 20.19                    |
| 33  | Ellagic acid                  | 301                       | 301*, 229               | 170            | 0, 24               | Negative | 21.41                    |
| 34  | Trans-cinnamic acid           | 149                       | 131.2*                  | 120            | 30                  | Negative | 21.44                    |
| 35  | Quercetin                     | 300.99                    | 151.2*, 179.2           | 145            | 16, 12              | Negative | 21.87                    |
| 36  | Phloretin                     | 272.99                    | 167*, 123               | 116            | 8, 20               | Negative | 22.30                    |
| 37  | Kaempferol                    | 287.01                    | 153*, 69.1              | 60             | 36, 50              | Positive | 23.84                    |
| 38  | Isorhamnetin                  | 314.99                    | 300.2*, 196.1           | 145            | 16, 4               | Negative | 24.57                    |

\* These product ions were used for quantification.

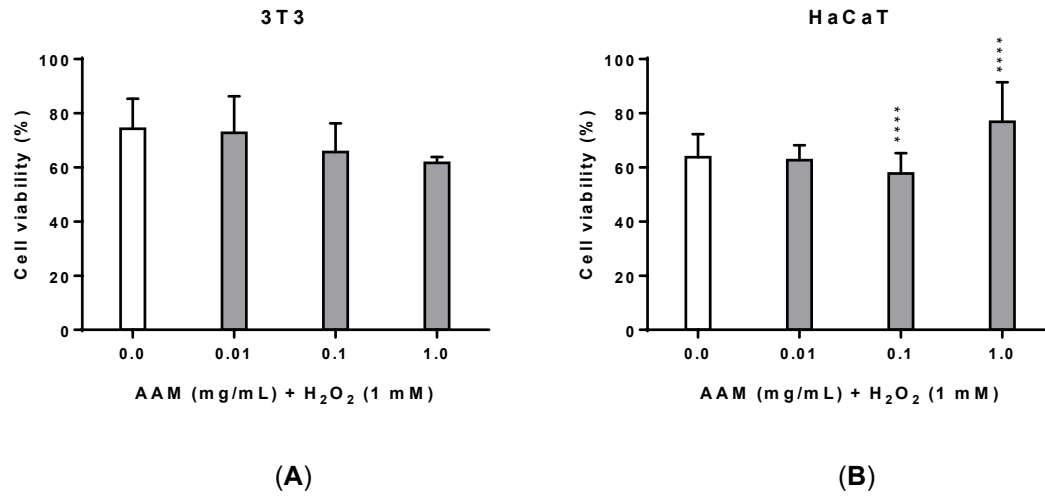

**Figure S1.** Cytoprotective activity of AAM in 3T3 (A) and HaCaT (B) cell lines for 1 mM H<sub>2</sub>O<sub>2</sub> during 2.5 h by MTT assay and expressed as percentage of cell viability respect to untreated cells. H<sub>2</sub>O<sub>2</sub> cell viability was used as positive control. Results are expressed as mean  $\pm$  standard error of  $n = 3$  (3T3) and  $n = 3$  (HaCaT). A two-way analysis of variance (ANOVA) and a Bonferroni *post hoc* assay have been performed. Statistical differences were considered as follows: \*\*\*\* $p \leq 0.0001$  comparison with positive control.
